# Supplementary material
Source: HighWire-hosted journal article supplement (doi:10.1101/rna.080480.125)
Supplement: Supplemental_TableS1_total_RNA.xlsx [file Supplemental_TableS1_total_RNA.xlsx]

## Sheet: Legend of Table S1
Supplemental Table relating to Fig. 1-4 and Supplemental information, Tables S2, S3, S4
Description of table headers:
mouse #	male individuals
Date of isolation	date of epididymis dissection and spermatocyte extraction
Age (w)	age of sacrificed males in weeks
Strain / Genotype	C57BL/6J_DBA/F1		heterozygous F1 from C57BL/6J with DBA2
	FLNA wt		C57BL/6J with wild type Filamin A
	FLNB-R		C57BL/6J with Filamin B (constitutively edited R version)
	FLNB-Q_C57BL/6J/F1		heterozygous F1 from C57BL/6J with wild type Filamin and C57BL/6J
	FLNA-R_FLNB-R/F1		homozygous F1 from Filamin A (constitutively edited R version) and Filamin B (constitutively edited R version)
Lab origin	MJ: Michael Jantsch; MW: Mark Wossidlo
RNA concentration (ng/uL)	total RNA concentration measured by Qubit
Send for RNA seq	aliquots of total RNA send for small RNA seq

## Sheet: Sperm genotypes
								NB-tRNA
mouse #	Date of isolation	Age (w)	Strain / Genotype	Lab origin	RNA concentration (ng/uL)	used for	Send for RNA seq	Gly-GCC	Glu-CUC	Ala-AGC	Lys-CUU	His-GUG	Cys-GCA
					Qubit	RNA per cell determination	contribution to pools
1	15.07.2022	19	C57BL/6J_DBA/F1	MW	55	x	Pool 1	x	x	x	x	x	x
2	19.07.2022	19	C57BL/6J_DBA/F1	MW	58	x		x	x	x	x	x	x
3	19.07.2022	19	C57BL/6J_DBA/F1	MW	85	x	Pool 2	x	x	x	x	x	x
4	27.07.2022	20.5	C57BL/6J_DBA/F1	MW	74	x	Pool 3	x	x	x	x	x	x
5	29.07.2022	21	C57BL/6J_DBA/F1	MW	87	x		x	x	x	x	x	x
6	11.08.2022	21.8	FLNA wt	MJ	55	x		x	x	x	x	x	x
12	17.08.2022	49.5	FLNB-Q wt	MJ	5.58	x
13	17.08.2022	49.5	FLNB-Q het	MJ	8.98	x
14	17.08.2022	28.5	FLNB-Q_C57BL/6J/F1	MJ	51.2		Pool 1	x	x	x
15	17.08.2022	28.5	FLNB-Q_C57BL/6J/F1	MJ	92.4			x	x	x
16	17.08.2022	28.5	FLNB-Q_C57BL/6J/F1	MJ	88.8		Pool 2	x	x	x
17	31.08.2022	12	FLNA-R_FLNB-R/F1	MJ	8.48	x		x
18	31.08.2022	12	FLNA-R_FLNB-R/F1	MJ	18.6	x		x
19	12.09.2022	8	FLNB-Q hom	MJ	8.26	x
20	12.09.2022	8	FLNB-Q hom	MJ	7.55	x
21	12.09.2022	8	FLNB-Q hom	MJ	8.26	x
22	12.09.2022	8	FLNB-Q hom	MJ	8.26	x
26	11.10.2022	30	FLNA wt	MJ	79.5		Pool 3	x	x
27	11.10.2022	11	FLNA-R_FLNB-R/F1	MJ	92			x	x
44	13.03.2023	18	C57BL/6J_DBA/F1	MW	26.6			x	x
45	14.03.2023	18	C57BL/6J_DBA/F1	MW	38.8			x	x
52	24.03.2023	19	C57BL/6J_DBA/F1	MW	20.4			x
53	24.03.2023	19	C57BL/6J_DBA/F1	MW	22.4			x
54	24.03.2023	19	C57BL/6J_DBA/F1	MW	27.5			x
55	24.03.2023	19	C57BL/6J_DBA/F1	MW	15.2			x
56	24.03.2023	19	C57BL/6J_DBA/F1	MW	24.2			x
57	2023-04-05	26	FLNA-R_FLNB-R/F1	MJ	15			x	x
58	2023-04-05	26	FLNA-R_FLNB-R/F1	MJ	9.74			x	x
59	2023-04-05	26	FLNA-R_FLNB-R/F1	MJ	16.6			x	x
60	2023-04-05	26	FLNA-R_FLNB-R/F1	MJ	10.1			x	x
65	2023-06-16	26	FLNA wt	MJ	47.9			x	x

## Sheet: total sperm RNA mass
		For Box plot: RNA mass quantification per spermatocyte
	mouse #	(fg)
	1	97.33
	2	98.45
	3	150.44
	4	55.64
	5	82.29
	6	95.19
	12	43.98
	13	42.84
	17	90.96
	18	137.58
	19	44.08
	20	47.02
	21	37.9
	22	44.74
	average mass per cell	76.3171
	total RNA mass	76 fg	10 ng	20 ng	30 ng	33 ng	50 ng	100 ng
	cells	1	136986	273972	410958	452054	684930	1369860

## Sheet: Oocyte genotypes
#	Date of isolation	Age (w)	Strain / Genotype	Lab origin
1	11.11.22	9	FLNB-R	MJ
2	11.11.22	9	FLNB-R	MJ
3	11.11.22	9	FLNB-R	MJ
4	11.11.22	9	FLNB-R	MJ
5	11.11.22	9	FLNB-R	MJ
6	18.11.22	18.5	FLNA-R_FLNB-R/F1	MJ
7	18.11.22	12.5	FLNA-R_FLNB-R/F1	MJ
8	18.11.22	12.5	FLNA-R_FLNB-R/F1	MJ
9	18.11.22	17.5	FLNA-R_FLNB-R/F1	MJ
10	24.01.23	17	C57BL/6J_DBA/F1	MW
11	24.01.23	17	C57BL/6J_DBA/F1	MW
12	24.01.23	17	C57BL/6J_DBA/F1	MW
13	24.01.23	17	C57BL/6J_DBA/F1	MW
14	24.01.23	17	C57BL/6J_DBA/F1	MW
