# Supplementary material
Source: HighWire-hosted journal article supplement (doi:10.1101/rna.080480.125)
Supplement: Supplemental_TableS2_tDR_mods.xlsx [file Supplemental_TableS2_tDR_mods.xlsx]

## Sheet: Legend of Table S2
Supplemental Table S2B relating to Supplemental Fig. 4B,C
Description: Determining of factor that probe against tRNA-GlyGCC reveals when probing unmodified and modified synthetic tDRs
1. Ratios of measured pixel density (ImageJ) were calculated from raw data. Derived factor for probe detection of unmodified tDR over modified tDR = yellow labelled value
2. Pixel densities (ImageJ) per mass of loaded oligo were used to derive a linear function, which was used to arrive at calculated pixel densities per mass of oligo. Derived factor for probe detection of unmodified tDR over modified tDR = black labelled value

## Sheet: Gel 1_unmod-to-mod
5' tDR-Gly-GCC (unmodified) vs (modified)	Gel 1
				US_0016: modified
				AD_138: unmodified
DATA & PIXEL ANALYSIS
pigogram loaded	synthetic tDR density
1000	n.d.
750	n.d.
500	n.d.
250	39199.6
100	21792.6
50	9893.57
25	4466.83
10	962.033
5	753.891
1	n.d
pigogram loaded	synthetic tDR density
1000	n.d.
750	n.d.
500	n.d.
250	77737
100	29643.2
50	18118.2
25	9083.52
10	3369.83
5	1152.55
1	n.d
CALCULATIONS
	original pixel ratio
pigogram loaded	unmodified/modified
250	1.98311
100	1.36024
50	1.83131
25	2.03355
10	3.50282
average factor	2.18198
modified	y = 231,04x -1406,8	unmodified	y =307,48x - 635,86
pigogram loaded	calculated pixels	pigogram loaded	calculated pixels
250	56353.2	250	76234.1
100	21697.2	100	30112.1
50	10145.2	50	14738.1
25	4369.2	25	7051.14
10	903.6	10	2438.94
		5	901.54
	calculated pixel ratio acc. to function
pigogram loaded	unmodified/modified
250	1.35279
100	1.38784
50	1.45272
25	1.61383
10	2.69914
average factor	1.78838

## Sheet: Gel 2_unmod-to-mod
5' tDR-Gly-GCC (unmodified) vs (modified)	Gel 2
				US_0016: modified
				AD_138: unmodified
DATA & PIXEL ANALYSIS
pigogram loaded	synthetic tDR density
1000	n.d.
750	n.d.
500	n.d.
250	33117.6
100	16918.2
50	6514.75
25	2621.3
10	711.435
5	n.d.
1	n.d.
pigogram loaded	synthetic tDR density
1000	n.d.
750	n.d.
500	n.d.
250	88852.2
100	22611.9
50	8733.94
25	3220.13
10	906.263
5	n.d
1	n.d
CALCULATIONS
	original pixel ratio
pigogram loaded	unmodified/modified
250	2.68293
100	1.33655
50	1.34064
25	1.22845
10	1.27385
average factor	1.57248
modified	y = 136.21x + 126.1	unmodified	y = 245.65x - 2493.1
pigogram loaded	calculated pixels	pigogram loaded	calculated pixels
250	34178.6	250	58919.4
100	13747.1	100	22071.9
50	6936.6	50	9789.4
25	3531.35	25	3648.15
10	1488.2	10	-36.6
	calculated pixel ratio acc. to function
pigogram loaded	unmodified/modified
250	1.72387
100	1.60557
50	1.41127
25	1.03308
10	n.d.
average factor	1.44344
