# Supplementary material
Source: HighWire-hosted journal article supplement (doi:10.1101/rna.080480.125)
Supplement: Supplemental_TableS3_tDR_quant.xlsx [file Supplemental_TableS3_tDR_quant.xlsx]

## Sheet: Legend of Table S3
Supplemental Table S3 relating to Fig. 4C
Every sheet contains the data points for pixel intensity measurements and calculations from specific northern blots for specific tRNA isoacceptors
Pixel densities (ImageJ) per mass of loaded oligo were used to derive a linear function, which was used to arrive at calculated pixel densities per mass of oligo. Derived factor for probe detection of unmodified tDR over modified tDR = black labelled value
The summary of the tDR copy number values derived from the calculations, and which have been used to create Fig. 4C is appended as the last sheet

## Sheet: Gly_m1-3_22.07.22
5' tDR-GlyGCC	Gel 1
synthetic tDR is 32 nt, AD0137					mouse #	total RNA loaded
					1	100 ng
					2	100 ng
					3	100 ng
DATA & PIXEL ANALYSIS
pigogram loaded	synthetic tDR density
1000	n.d.
750	19576.3
500	14212.6
250	7017.05
100	2096.82
50	729.263
25	172.364
10	n.d.
5	n.d.
CALCULATIONS
mouse #	mass loaded (microgram total RNA)	Cell number	endo tDR-Gly pixel density
1	0.1	1369860	30649.6
2	0.1	1369860	43709.2
3	0.1	1369860	29978
mouse #
	calculated mass in pigogram (pg)	Cell number	picogram 5' tDR per cell	moles 5' tDR per cell (*10^-18)	equals 5' tDR per cell
1	1046.28	1369860	0.000763786	0.7398	44550
2	1482.18	1369860	0.001082	0.1051	63310
3	1023.86	1369860	0.000747422	0.07301	43960
					50606.7	Average number per cell
with multimers
calculated mass (pg): y +1543,2/56,973 =x	total (pg)	ng	cells	per cell (pg)	equals (mol) per cell	equals molecules per cell
27.0865	411.173	15.5655			1,611 pmol	970400000000
27.0865		0.0270865	16404.2	0.00165119
27.0865		0.0270865	32808.5	0.000825594
27.0865		0.0270865	65617	0.000412797
				0.000963193	2,207 amol	1329000

## Sheet: Gly_m1-3_12.08.22
5' tDR-GlyGCC	Gel 2
synthetic tDR is 32 nt, AD0138 (Biotin)					mouse #	total RNA loaded
					1	30 ng
					2	30 ng
					3	30 ng
DATA & PIXEL ANALYSIS
pigogram loaded	synthetic tDR density
1000	n.d.
750	78844.1
500	70479.2
250	48558.7
100	18735.3
50	10151.9
25	3989.48
10	2152.51
5	487.192
CALCULATIONS
mouse #	mass loaded (microgram total RNA)	Cell number	endo tDR-Gly pixel density
1	0.03	410958	45858.5
2	0.03	410958	51044.1
3	0.03	410958	39760.4
mouse #	calculated mass in pigogram (pg)	Cell number	picogram 5' tDR per cell	moles 5' tDR per cell (*10^-18)	equals 5' tDR per cell
1	236.778	410958	0.000576162	0.05646	34000
2	263.431	410958	0.000641017	0.0623	37520
3	205.435	410958	0.000499894	0.04867	29310
					33610	Average number per cell

## Sheet: Gly_m1-3_19.08.22
5' tDR-GlyGCC	Gel 3
synthetic tDR is 32 nt, AD0138 (Biotin)					mouse #	total RNA loaded
					1	50 ng
					2	50 ng
					3	50 ng
DATA & PIXEL ANALYSIS
pigogram loaded	synthetic tDR density
1000	n.d.
750	73841.7
500	34640.8
250	28519.3
100	15899.6
50	6853.37
25	3582.79
10	1023.26
5	n.d
CALCULATIONS
mouse #	mass loaded (microgram total RNA)	Cell number	endo tDR-Gly pixel density
1	0.05	684930	8707.12
2	0.05	684930	7486.49
3	0.05	684930	14279.6
mouse #	calculated mass in pigogram (pg)	Cell number	picogram 5' tDR per cell	moles 5' tDR per cell (*10^-18)	equals 5' tDR per cell
1	264.977	684930	0.000386867	0.03796	22860
2	232.826	684930	0.000339927	0.0331	19930
3	411.753	684930	0.000601161	0.05841	35170
					25986.7	Average number per cell
with multimers
calculated mass (pg): y +1543,2/56,973 =x	total (pg)	ng	cells	per cell (pg)	equals (mol) per cell	equals molecules per cell
27.0865	411.173	15.5655			1,611 pmol	970400000000
27.0865		0.0270865	16404.2	0.00165119
27.0865		0.0270865	32808.5	0.000825594
27.0865		0.0270865	65617	0.000412797
				0.000963193	2,207 amol	1329000

## Sheet: Gly_03.09.22
5' tDR-GlyGCC	Gel 1
synthetic tDR is 32 nt, AD0138 (Biotin)					mouse #		loaded
					17	total RNA	300.000 cells
					18	total RNA	300.000 cells
DATA & PIXEL ANALYSIS
pigogram loaded	synthetic tDR density
1000	n.d.
750	48182.9
500	38218.7
250	22426.6
100	8081.55
50	5034.25
25	1532.65
10	650.92
5	n.d
CALCULATIONS
mouse #	mass loaded (microgram total RNA)	Cell number	endo tDR-Gly pixel density
17	0.05	300000	7628.58
18	0.05	300000	12344.6
mouse #	calculated mass in pigogram (pg)	Cell number	picogram 5' tDR per cell	moles 5' tDR per cell (*10^-18)	equals 5' tDR per cell
17	88.7024	300000	0.000295675	0.0292	17590
18	159.655	300000	0.000532184	0.05159	31070
					24330	Average number per cell
with multimers
calculated mass (pg): y +1543,2/56,973 =x	total (pg)	ng	cells	per cell (pg)	equals (mol) per cell	equals molecules per cell
27.0865	411.173	15.5655			1,611 pmol	970400000000
27.0865		0.0270865	16404.2	0.00165119
27.0865		0.0270865	32808.5	0.000825594
27.0865		0.0270865	65617	0.000412797
				0.000963193	2,207 amol	1329000

## Sheet: Gly_m4,5,6_10.10.22
5' tDR-GlyGCC	Gel 1
synthetic tDR is 32 nt, AD0138 (Biotin)					mouse #	total RNA loaded
					4	30 ng
					5	30 ng
					6	30 ng
DATA & PIXEL ANALYSIS
pigogram loaded	synthetic tDR density
1000	n.d.
750	n.d.
500	43522
250	34788.7
100	16485.3
50	5665.2
25	2645.3
10	813.335
5	n.d.
CALCULATIONS
mouse #	mass loaded (microgram total RNA)	Cell number	endo tDR-Gly pixel density
4	0.03	410958	16994.9
5	0.03	410958	14059
6	0.03	410958	8918.77
mouse #	calculated mass in pigogram (pg)	Cell number	picogram 5' tDR per cell	moles 5' tDR per cell (*10^-18)	equals 5' tDR per cell
4	121.171	410958	0.000294851	0.02823	17000
5	100.761	410958	0.000245185	0.02434	14650
6	65.025	410958	0.000158228	0.01557	9379
					13676.3	Average number per cell
with multimers
calculated mass (pg): y +1543,2/56,973 =x	total (pg)	ng	cells	per cell (pg)	equals (mol) per cell
27.0865	411.173	15.5655			1,611 pmol
27.0865		0.0270865	16404.2	0.00165119
27.0865		0.0270865	32808.5	0.000825594
27.0865		0.0270865	65617	0.000412797
				0.000963193	2,207 amol

## Sheet: Gly_m4,5_24.01.23
5' tDR-GlyGCC	Gel 1
synthetic tDR is 32 nt, AD0138 (Biotin)					mouse #	total RNA loaded
					4	50 ng
					5	50 ng
DATA & PIXEL ANALYSIS
pigogram loaded	synthetic tDR density
1000	n.d.
750	n.d.
500	31978.8
250	27573.3
100	10392.6
50	3627.3
25	1290.31
10	329.435
5	133.364
CALCULATIONS
	mass loaded (microgram total RNA)	Cell number	endo tDR-Gly pixel density
mouse #
4	0.05	684930	15413.8
5	0.05	684930	15052.1
mouse #	calculated mass in pigogram (pg)	Cell number	picogram 5' tDR per cell	moles 5' tDR per cell (*10^-18)	equals 5' tDR per cell
4	144.963	684930	0.000211646	0.02044	12310
5	141.799	684930	0.000207027	0.02044	12310
					12310	Average number per cell
with multimers
calculated mass (pg): y +1543,2/56,973 =x	total (pg)	ng	cells	per cell (pg)	equals (mol) per cell
27.0865	411.173	15.5655			1,611 pmol
27.0865		0.0270865	16404.2	0.00165119
27.0865		0.0270865	32808.5	0.000825594
27.0865		0.0270865	65617	0.000412797
				0.000963193	2,207 amol

## Sheet: Gly_31.03.23
5' tDR-GlyGCC	Gel 1
synthetic tDR is 32 nt, AD0138 (Biotin)					mouse #	total RNA loaded
					52	30 ng
					53	30 ng
					54	30 ng
					55	30 ng
					56	30 ng
DATA & PIXEL ANALYSIS
pigogram loaded	synthetic tDR density
1000	n.d.
750	n.d
500	39026.2
250	22919.5
100	13040.1
50	4476.42
25	1708.06
10	n.d
5	n.d
CALCULATIONS
mouse #	mass loaded (microgram total RNA)	Cell number	endo tDR-Gly pixel density
52	0.03	410958	5373
53	0.03	410958	3718.52
54	0.03	410958	3417.69
55	0.03	410958	5720.95
56	0.03	410958	6048.95
mouse #	calculated mass in pigogram (pg)	Cell number	picogram 5' tDR per cell	moles 5' tDR per cell (*10^-18)	equals 5' tDR per cell
52	42.7577	410958	0.000104044	0.009734	5862
53	21.0896	410958	5.13182e-05	0.004867	2931
54	17.1498	410958	4.17313e-05	0.003894	2345
55	47.3146	410958	0.000115132	0.01168	7034
56	51.6103	410958	0.000125585	0.01265	7621
					5158.6	Average number per cell
with multimers
calculated mass (pg): y +1543,2/56,973 =x	total (pg)	ng	cells	per cell (pg)	equals (mol) per cell
27.0865	411.173	15.5655			1,611 pmol
27.0865		0.0270865	16404.2	0.00165119
27.0865		0.0270865	32808.5	0.000825594
27.0865		0.0270865	65617	0.000412797
				0.000963193	2,207 amol

## Sheet: Gly_14.05.23
5' tDR-GlyGCC	Gel 1
synthetic tDR is 32 nt, AD0138 (Biotin)				mouse #	total RNA loaded
				44	50 ng
				45	50 ng
				57	50 ng
				58	50 ng
				59	50 ng
DATA & PIXEL ANALYSIS
pigogram loaded	synthetic tDR density
1000	n.d.
750	n.d
500	39623.2
250	40184.4
100	30494.5
50	14259.3
25	5854.44
10	1997.13
5	609.506
CALCULATIONS
mouse #	mass loaded (microgram total RNA)	Cell number	endo tDR-Gly pixel density
44	0.05	684930	11580.5
45	0.05	684930	14655.6
57	0.05	684930	5918.15
58	0.05	684930	5058.12
59	0.05	684930	6082.56
mouse #	calculated mass in pigogram (pg)	Cell number	picogram 5' tDR per cell	moles 5' tDR per cell (*10^-18)	equals 5' tDR per cell
44	40.9602	684930	5.9802e-05	0.005841	3517
45	50.6703	684930	7.39789e-05	0.006814	4103
57	23.0804	684930	3.36975e-05	0.00292	1759
58	20.3648	684930	2.97327e-05	0.00292	1759
59	23.5996	684930	3.44555e-05	0.00292	1759
					2579.4	Average number per cell
with multimers
calculated mass (pg): y +1543,2/56,973 =x	total (pg)	ng	cells	per cell (pg)	equals (mol) per cell
27.0865	411.173	15.5655			1,611 pmol
27.0865		0.0270865	16404.2	0.00165119
27.0865		0.0270865	32808.5	0.000825594
27.0865		0.0270865	65617	0.000412797
				0.000963193	2,207 amol

## Sheet: Gly_09.06.24
5' tDR-GlyGCC	Gel 1
synthetic tDR is 32 nt, AD0138 (Biotin)					mouse #	total RNA loaded
					14	50 ng
					15	50 ng
					16	50 ng
					26	50 ng
					27	50 ng
DATA & PIXEL ANALYSIS
pigogram loaded	synthetic tDR density
1000	n.d.
750	n.d
500	36894.9
250	26864.2
100	13755.1
50	5355.78
25	1583.41
10	539.142
5	n.d
CALCULATIONS
mouse #	mass loaded (microgram total RNA)	Cell number	endo tDR-Gly pixel density
14	0.05	684930	14382.8
15	0.05	684930	14033.5
16	0.05	684930	16224.8
26	0.05	684930	10788.7
27	0.05	684930	10512.5
mouse #	calculated mass in pigogram (pg)	Cell number	picogram 5' tDR per cell	moles 5' tDR per cell (*10^-18)	equals 5' tDR per cell
14	129.758	684930	0.000189448	0.01849	11140
15	126.623	684930	0.000184869	0.01752	10550
16	146.294	684930	0.000213589	0.02044	12310
26	97.4958	684930	0.000142344	0.01363	8207
27	95.0156	684930	0.000138723	0.01363	8207
					10082.8	Average number per cell
with multimers
calculated mass (pg): y +1543,2/56,973 =x	total (pg)	ng	cells	per cell (pg)	equals (mol) per cell	equals molecules per cell
27.0865	411.173	15.5655			1,611 pmol	970400000000
27.0865		0.0270865	16404.2	0.00165119
27.0865		0.0270865	32808.5	0.000825594
27.0865		0.0270865	65617	0.000412797
				0.000963193	2,207 amol	1329000

[truncated: 18 more sheets: Gly_09.06.24 (2), Gly_18.01.25, Glu_m1-3_24.07.22, Glu_m4,5,6_12.08.22, Glu_m4,5_24.01.23, Glu_14.05.23, Glu_13.06.24, Glu_13.06.24 (2), Ala_m1-3_22.07.22 , Ala_m4-6_16.08.22, Ala_m14-16_22.08.22, Lys_m1-3_08.08.22, Lys_m4-6_12.08.22, His_m1-3_08.08.2, His_m4-6_12.08.22, Cys_m1-3_08.08.22, Cys_m4-6_12.08.22, Summary for Fig. 4C]
