# Supplementary material
Source: HighWire-hosted journal article supplement (doi:10.1101/rna.080480.125)
Supplement: Supplemental_TableS4_rsRNA_quant.xlsx [file Supplemental_TableS4_rsRNA_quant.xlsx]

## Sheet: Legend of Table S4
Supplemental Table S4 relating to Fig. 4C
Every sheet contains the data points for pixel intensity measurements and calculations from specific northern blots for a specific rsRNA species called rsRNA-28S-1
Pixel densities (ImageJ) per mass of loaded oligo were used to derive a linear function, which was used to arrive at calculated pixel densities per mass of RNA sample from spermatocytes.
The summary of the rsRNA-28S-1 copy number values derived from the calculations, and which have been used to create Fig. 4C is appended as the last sheet

## Sheet: rsRNA-28S_17.05.23
rsRNA-28s1	Gel 1
				mouse #	total RNA loaded
synthetic rsRNA is 23 nt, VIE514				44	50 ng
				45	50 ng
20230517-090325-[Phosphor].tif				57	50 ng
				58	50 ng
				59	50 ng
DATA & PIXEL ANALYSIS
pigogram loaded	synthetic rsRNA density
750	39027.6
500	27962.1
250	15000.4
100	6155.05
50	2342.99
25	876.021
10	216.95
CALCULATIONS
mouse #	mass loaded (microgram total RNA)	Cell number	endo rsRNA-28S-1 pixel density
44	0.05	684930	5828.2
45	0.05	684930	14134.9
57	0.05	684930	21740.7
58	0.05	684930	12676.7
59	0.05	684930	27254.8
mouse #	calculated mass in pigogram (pg)	Cell number	picogram rsRNA per cell	moles rsRNA per cell (*10^-18)	equals rsRNA per cell
44	103.584	684930	0.000151233	0.02030	12230
45	249.367	684930	0.000364077	0.04872	29340
57	382.848	684930	0.00055896	0.07579	45640
58	223.775	684930	0.000326713	0.04466	26900
59	479.622	684930	0.000700249	0.09474	57050
					34232	Average number per cell
	with multimers
	calculated mass (pg): y +1543,2/56,973 =x	total (pg)	ng	cells	per cell (pg)	equals (mol) per cell	equals molecules per cell
sup	27.0865	411.173	15.5655			1,611 pmol	970400000000
65617 cells	27.0865		0.0270865	16404.2	0.00165119
32808,5 cells	27.0865		0.0270865	32808.5	0.000825594
16404,25 cells	27.0865		0.0270865	65617	0.000412797
					0.000963193	2,207 amol	1329000

## Sheet: rsRNA-28S_13.06.24 (1)
rsRNA-28s1	Gel 1
synthetic rsRNA is 23 nt, VIE514					mouse #	total RNA loaded
					14	25 ng
					15	25 ng
					16	25 ng
					26	25 ng
					27	25 ng
DATA & PIXEL ANALYSIS
pigogram loaded	synthetic rsRNA density
750	n.d.
500	32265.7
250	39566.6
100	15370.5
50	6609.37
25	2699.48
10	948.678
5	n.d.
CALCULATIONS
mouse #	mass loaded (microgram total RNA)	Cell number	endo rsRNA-28S-1 pixel density
14	0.025	342465	5431.78
15	0.025	342465	9754.5
16	0.025	342465	10971
26	0.025	342465	10459.5
27	0.025	342465	8287.65
mouse #	calculated mass in pigogram (pg)	Cell number	picogram rsRNA per cell	moles rsRNA per cell (*10^-18)	equals rsRNA per cell
14	40.2531	342465	0.000117539	0.0203	12230
15	66.8168	342465	0.000195106	0.02707	16300
16	74.2923	342465	0.000216934	0.02977	17930
26	71.1491	342465	0.000207756	0.02842	17120
27	57.8028	342465	0.000168785	0.02301	13860
					15488	Average number per cell
with multimers
calculated mass (pg): y +1543,2/56,973 =x	total (pg)	ng	cells	per cell (pg)
27.0865	411.173	15.5655
#VALUE!		#VALUE!	16404.2	#VALUE!	equals (mol) per cell	equals molecules per cell
27.0865		0.0270865	32808.5	0.000825594	1,611 pmol	970400000000
27.0865		0.0270865	65617	0.000412797
				#VALUE!
					2,207 amol	1329000

## Sheet: rsRNA-28S_13.06.24 (2)
rsRNA-28s1	Gel 1
synthetic rsRNA is 23 nt, VIE514					mouse #	total RNA loaded
					57	25 ng
					58	25 ng
					59	25 ng
					60	25 ng
					65	25 ng
DATA & PIXEL ANALYSIS
pigogram loaded	synthetic rsRNA density
750	n.d.
500	32693.5
250	28014.3
100	12572.4
50	4503.03
25	1529.92
10	587.607
5	n.d.
CALCULATIONS
mouse #	mass loaded (microgram total RNA)	Cell number	endo rsRNA-28S-1 pixel density
57	0.025	342465	8147.65
58	0.025	342465	5198.61
59	0.025	342465	10480.1
60	0.025	342465	7241.82
65	0.025	342465	7082.65
mouse #	calculated mass in pigogram (pg)	Cell number	picogram rsRNA per cell	moles rsRNA per cell (*10^-18)	equals rsRNA per cell
57	75.9229	342465	0.000221695	0.02977	17930
58	50.6656	342465	0.000147944	0.02030	12230
59	95.8993	342465	0.000280026	0.03790	22820
60	68.1649	342465	0.000199042	0.02707	16300
65	66.8017	342465	0.000195061	0.02707	16300
					AVERAGE
					17116	Average number per cell
with multimers
calculated mass (pg): y +1543,2/56,973 =x	total (pg)	ng	cells	per cell (pg)
27.0865	411.173	15.5655
27.0865		0.0270865	16404.2	0.00165119	equals (mol) per cell	equals molecules per cell
27.0865		0.0270865	32808.5	0.000825594	1,611 pmol	970400000000
27.0865		0.0270865	65617	0.000412797
				0.000963193
					2,207 amol	1329000

## Sheet: rsRNA-28S_03.08.23
rsRNA-28s1	Gel 1
				mouse #	total RNA loaded
synthetic rsRNA is 23 nt, VIE514				69	50 ng
				70	50 ng
				71	50 ng
DATA & PIXEL ANALYSIS
pigogram loaded	synthetic rsRNA density
750	39027.6
500	37349.5
250	26550.4
100	15741.7
50	5249.42
25	2505.48
10	1176.68
5	296.95
CALCULATIONS
mouse #	mass loaded (microgram total RNA)	Cell number	endo rsRNA-28S-1 pixel density
69	0.05	684930	12974.9
70	0.05	684930	10108
71	0.05	684930	7712.65
mouse #	calculated mass in pigogram (pg)	Cell number	picogram rsRNA per cell	moles rsRNA per cell (*10^-18)	equals rsRNA per cell
69	112.272	684930	0.000163918	0.02165	13040
70	85.7342	684930	0.000125172	0.01759	10600
71	63.5615	684930	9.28e-05	0.01218	7335
					10325	Average number per cell

## Sheet: Summary for Fig. 4C
	For Box plots RNA mass quantification
	mouse#	rsRNA-28S-1 per sperm
	44	12230
	45	29340
	57	45640
	58	26900
	59	57050
	69	13040
	70	10600
	71	7335
	14	12230
	15	16300
	16	17930
	26	17120
	27	13860
	57	17930
	58	12230
	59	22820
	60	16300
	65	16300
	average number per cell	20286.4
